# Supplementary material for: A highly efficient solution and solid state ESIPT fluorophore and its OLED application
Source: Royal Society of Chemistry journal article supplement (doi:10.1039/d0nj05600f), 2021-01-01

## Electronic Supplementary Information

### A highly efficient solution and solid state ESIPT fluorophore and its OLEDs application

Virgile Trannoy,<sup>ad</sup> Anne Léaustic,<sup>a</sup> Sophie Gadan,<sup>a</sup> Régis Guillot,<sup>a</sup> Clémence Allain,<sup>b</sup> Gilles Clavier,<sup>b</sup> Sandra Mazerat,<sup>a</sup> Bernard Geffroy\*<sup>ce</sup> and Pei Yu\*<sup>a</sup>

<sup>a</sup> Université Paris-Saclay, CNRS, Institut de Chimie Moléculaire et des Matériaux d'Orsay, 91405, Orsay, France.

<sup>b</sup> Université Paris-Saclay, ENS Paris-Saclay, CNRS, PPSM, 91190 Gif-sur-Yvette, France.

<sup>c</sup> Université Paris-Saclay, CEA, CNRS, NIMBE, LICSEN, 91191, Gif-sur-Yvette, France.

<sup>d</sup> Present address : Instituto de Ciencia Molecular (ICMol), Universidad de Valencia, c/ Catedrático José Beltrán 2, 46980 Paterna, Spain.

<sup>e</sup> LPICM, CNRS, Ecole Polytechnique, Institut Polytechnique de Paris, route de Saclay, 91128 Palaiseau, France.

### Table of contents

|                                                    |   |
|----------------------------------------------------|---|
| X-Ray crystallography                              | 2 |
| Additional fluorescence data                       | 5 |
| AFM images                                         | 6 |
| <sup>1</sup> H NMR and <sup>13</sup> C NMR spectra | 7 |

## X-Ray single crystal structure

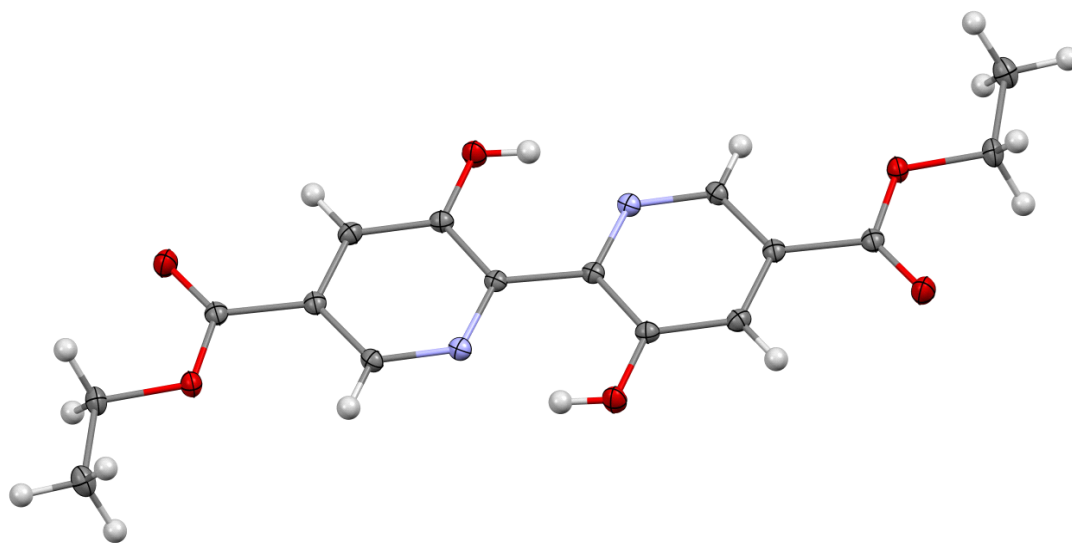

**Fig. S01.** An ORTEP drawing of compound **BP(OH)<sub>2</sub>DCet<sub>2</sub>**. Thermal ellipsoids are shown at the 30% level.

X-ray diffraction data for compound **BP(OH)<sub>2</sub>DCet<sub>2</sub>** were collected on a Kappa X8 APPEX II Bruker diffractometer equipped with a graphite-monochromated MoK<sub>α</sub> radiation ( $\lambda = 0.71073$  Å). Crystal was mounted on a CryoLoop (Hampton Research) with Paratone-N (Hampton Research) as cryoprotectant and then flashfrozen in a nitrogen-gas stream at 100 K. The temperature of the crystal was maintained at the selected value by means of a 700 series Cryostream cooling device to within an accuracy of  $\pm 1$  K. The data were corrected for Lorentz polarization and absorption effects. The structures were solved by direct methods using SHELXS-97<sup>SRX1</sup> and refined against  $F^2$  by full-matrix least-squares techniques using SHELXL-2018<sup>SRX2</sup> with anisotropic displacement parameters for all non-hydrogen atoms. Hydrogen atoms were located on a difference Fourier map and introduced into the calculations as a riding model with isotropic thermal parameters. All calculations were performed by using the Crystal Structure crystallographic software package WINGX.<sup>SRX3</sup>

The crystal data collection and refinement parameters are given in Table SX1.

The asymmetric unit of the crystal contains one-half-molecule.

CCDC 2004784 contain the supplementary crystallographic data for this paper. These data can be obtained free of charge from the Cambridge Crystallographic Data Centre via <http://www.ccdc.cam.ac.uk/Community/Requestastructure>.

**Table SX1.** Crystallographic data and structure refinement details.

| <b>Compound</b>                 | <b>BP(OH)<sub>2</sub>DCEt<sub>2</sub></b>                     |
|---------------------------------|---------------------------------------------------------------|
| CCDC                            | 2004784                                                       |
| Empirical Formula               | C <sub>16</sub> H <sub>16</sub> N <sub>2</sub> O <sub>6</sub> |
| M <sub>r</sub>                  | 332.31                                                        |
| Crystal size, mm <sup>3</sup>   | 0.21 x 0.09 x 0.08                                            |
| Crystal system                  | monoclinic                                                    |
| Space group                     | <i>C</i> 2/ <i>c</i>                                          |
| a, Å                            | 16.3814(6)                                                    |
| b, Å                            | 11.6206(5)                                                    |
| c, Å                            | 8.1169(3)                                                     |
| α, °                            | 90                                                            |
| β, °                            | 102.453(2)                                                    |
| γ, °                            | 90                                                            |
| Cell volume, Å <sup>3</sup>     | 1508.79(10)                                                   |
| Z ; Z'                          | 4 ; 1/2                                                       |
| T, K                            | 100(1)                                                        |
| Radiation type;<br>wavelength Å | MoKα; 0.71073                                                 |
| F <sub>000</sub>                | 696                                                           |

|                                                                   |                |
|-------------------------------------------------------------------|----------------|
| $\mu$ , mm <sup>-1</sup>                                          | 0.114          |
| range, °                                                          | 2.166 - 30.642 |
| Reflections collected                                             | 15 738         |
| Reflections unique                                                | 2 310          |
| R <sub>int</sub>                                                  | 0.0341         |
| GOF                                                               | 1.060          |
| Refl. obs.<br>$I > 2(I)$                                          | 1 743          |
| Parameters                                                        | 111            |
| wR <sub>2</sub> (all data)                                        | 0.1249         |
| R value $I > 2(I)$                                                | 0.0415         |
| Largest diff. peak<br>and hole (e <sup>-</sup> ·Å <sup>-3</sup> ) | 0.511 ; -0.251 |

[SRX1] Sheldrick, G. M. SHELXS-97, Program for Crystal Structure Solution, University of Göttingen, Göttingen, Germany, **1997**.

[SRX2] Sheldrick, G. M. *Acta Crystallogr. A* **2008**, *64*, 112-122.

[SRX3] Farrugia, L. J. *J. Appl. Cryst.* **1999**, *32*, 837-838.

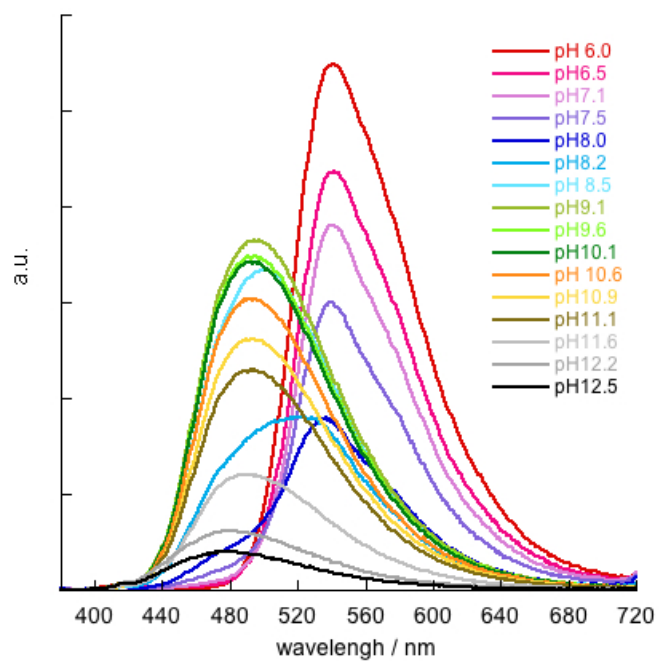

Figure S1. Fluorescence changes of BP(OH)<sub>2</sub>DCEt<sub>2</sub> vs pH in H<sub>2</sub>O-DMSO (3%) at RT

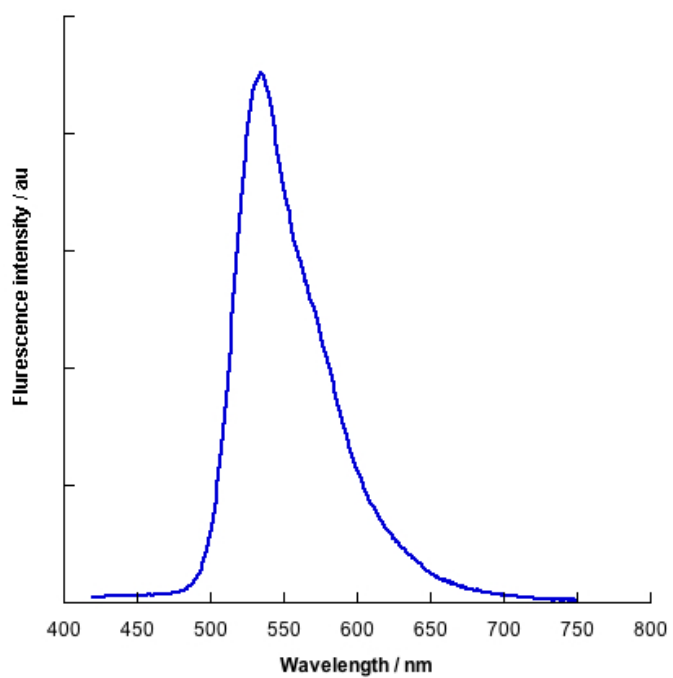

Figure S2. Fluorescence of microcrystals of BP(OH)<sub>2</sub>DCEt<sub>2</sub> at RT

## AFM images:

Tapping mode topography and phase imaging was accomplished using an Innova AFM Bruker with NanoDrive v8.02 software.

Tapping mode images were acquired using silicon tips from Nanosensors (PPP NCSTR) with a resonance frequency ranging between 76 and 263 kHz. Images were processed using WsXM software, freely available on internet.

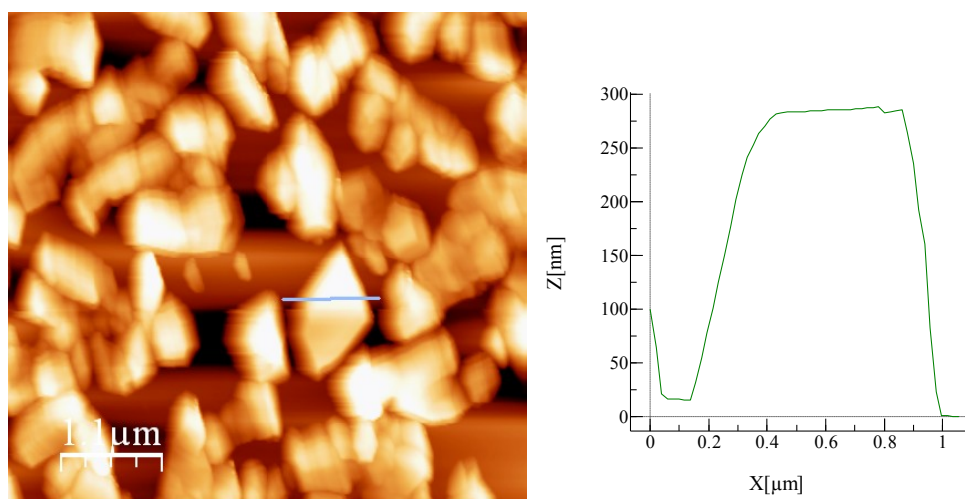

Figure S3. AFM image of a 70 nm thick neat film of  $\text{BP(OH)}_2\text{DCEt}_2$  at RT where bright spots

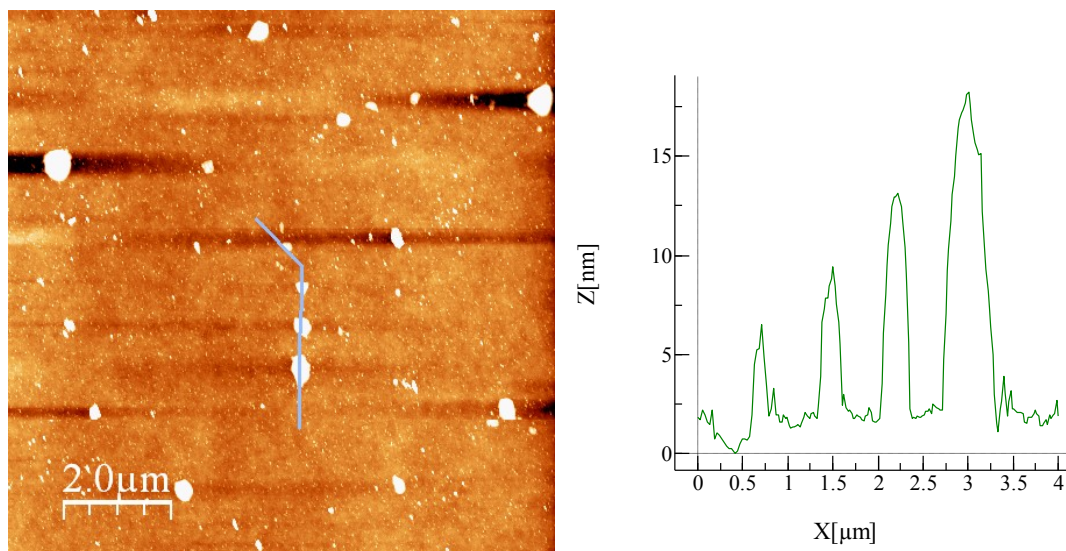

Figure S4. AFM image of DPVBi film doped with 10% of  $\text{BP(OH)}_2\text{DCEt}_2$  at RT

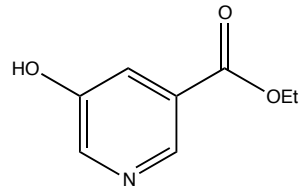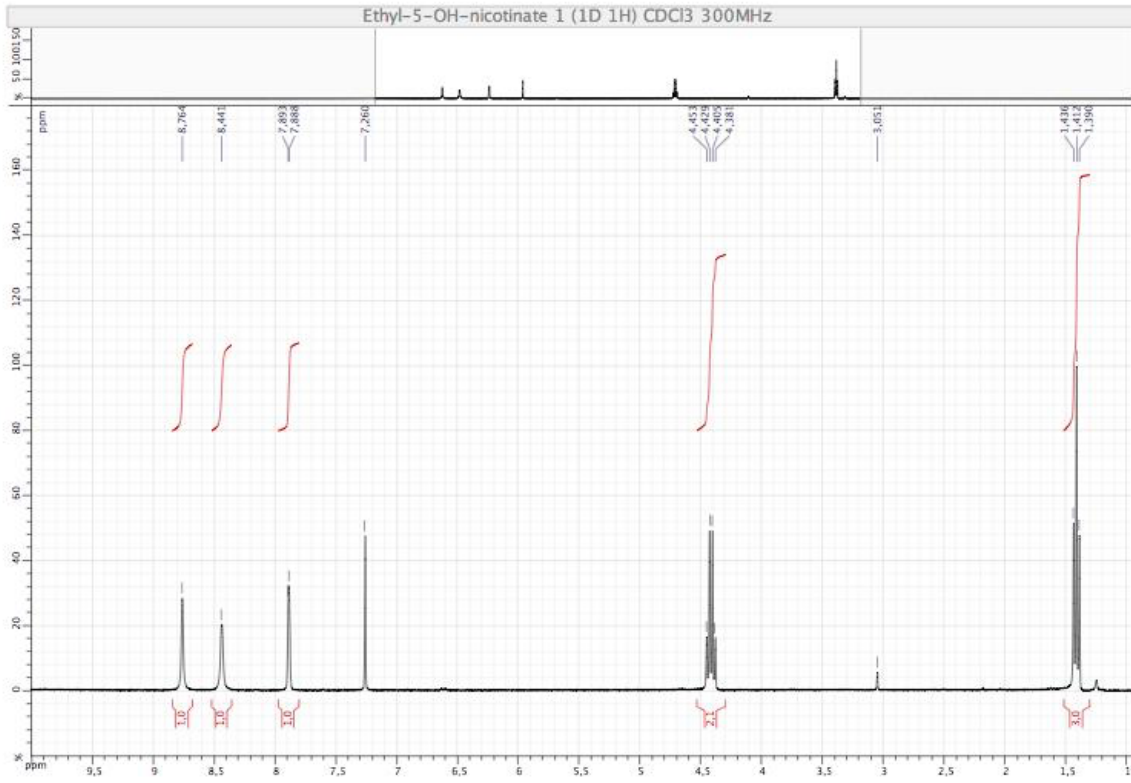

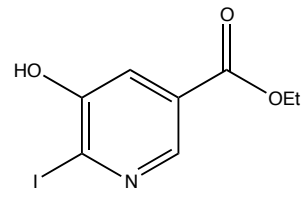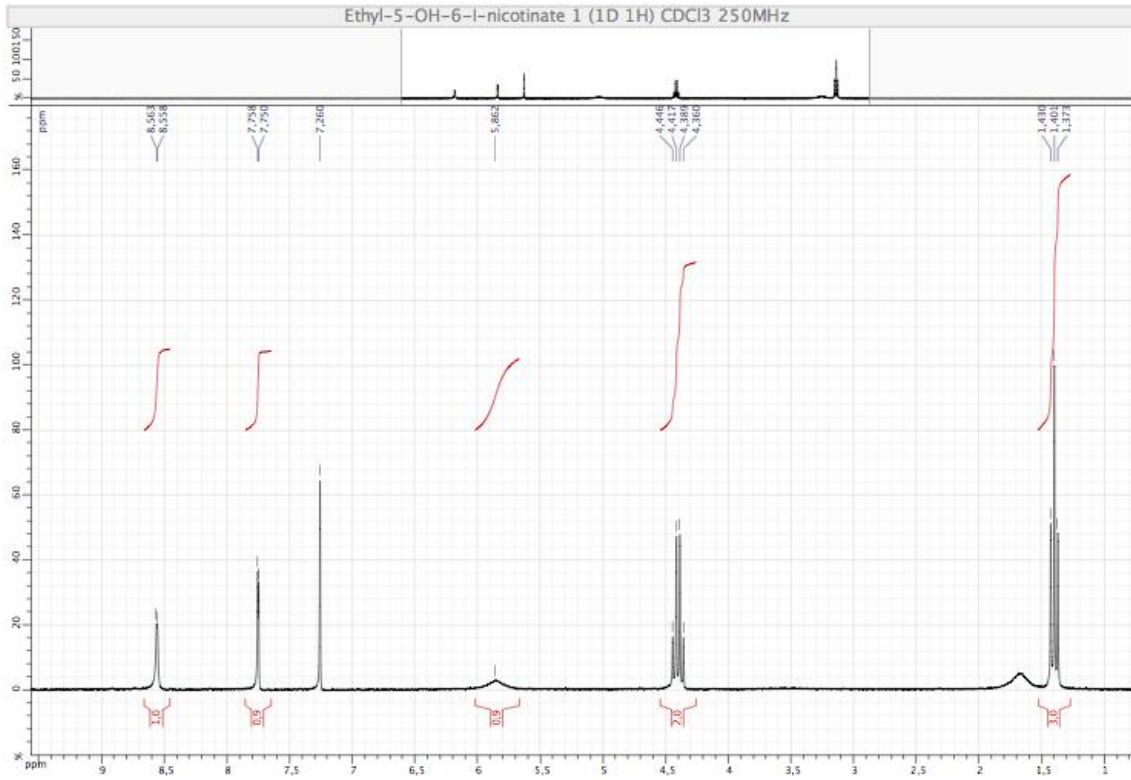



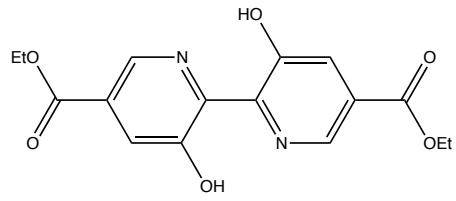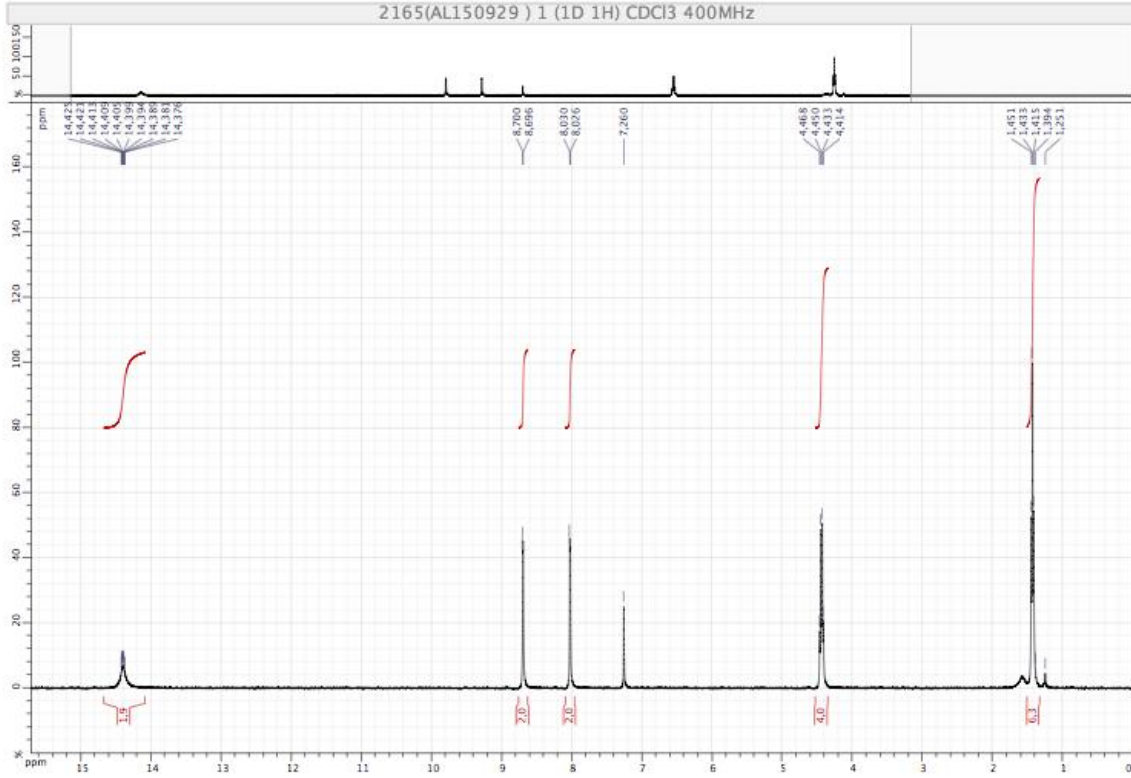

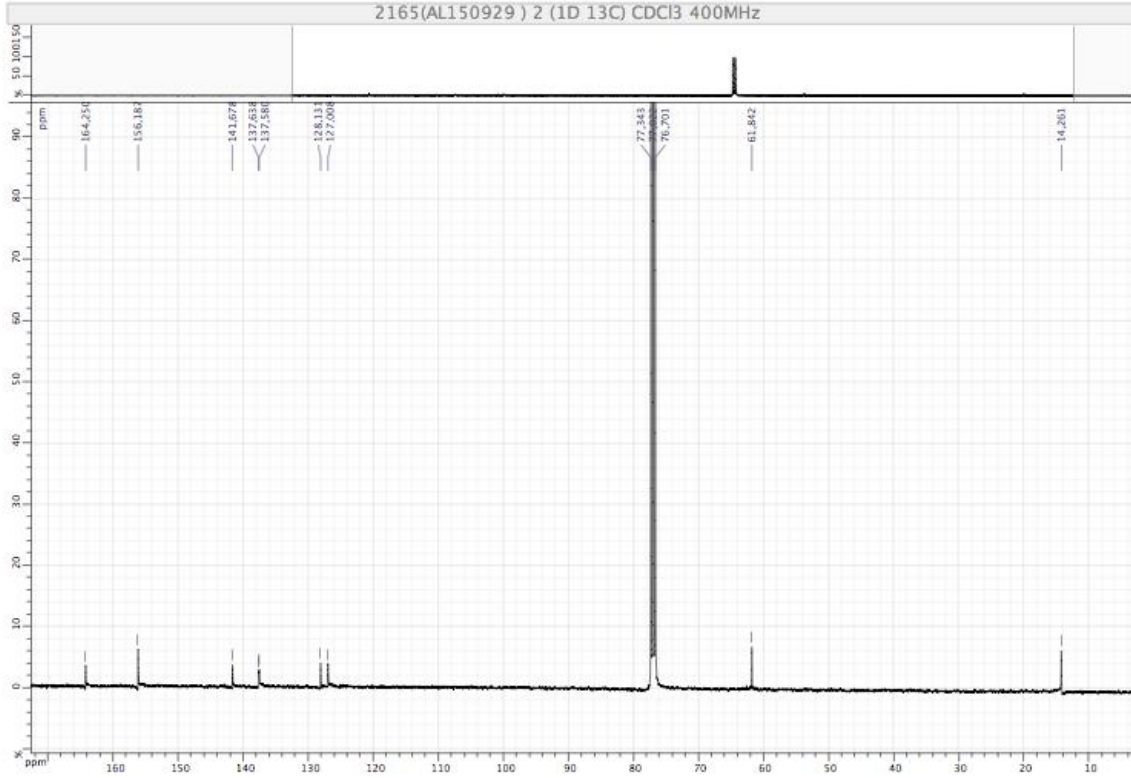

Supplement: d0nj05600f1.pdf [file d0nj05600f1.pdf]
